# Supplementary material for: A Phase I Trial of CT900, a Novel α-Folate Receptor–Mediated Thymidylate Synthase Inhibitor, in Patients with Solid Tumors with Expansion Cohorts in Patients with High-Grade Serous Ovarian Cancer
Source: Oxford University Press journal article supplement (doi:10.1158/1078-0432.ccr-22-1268), 2022-08-19
Supplement: ccr-22-1268_supplementary_table_s2_suppts2.docx [file ccr-22-1268_supplementary_table_s2_suppts2.docx]

**Supplementary Table 2**

Drug-related Toxicities by Dose in the Dose Escalation Cohort q2Wk Schedule (>10% total)
